# Supplementary material
Source: PubMed Central journal article supplement (PMC4159144)
Supplement: NIHMS588819-supplement-01.pdf [file NIHMS588819-supplement-01.pdf]

**Supplementary Table 1. PCR Primer Sequences**

| <b>Gene name</b>   | <b>Forward primer sequence (F)</b> | <b>Reverse primer sequence (R)</b> |
|--------------------|------------------------------------|------------------------------------|
| <i>Acadm</i>       | F: GGGTTTAGTTTTGAGTTGACGG          | R: CCCCCTTTTTGTCATATTCCG           |
| <i>Acadl</i>       | F: TCTTTTCCTCGGAGCATGACA           | R: GACCTCTCTACTCACTTCTCCAG         |
| <i>Acc1</i>        | F: ATGGGCGGAATGGTCTCTTTC           | R: TGGGGACCTTGTCTTCATCAT           |
| <i>Adiponectin</i> | F: TGTTCTCTTAATCCTGCCCA            | R: CCAACCTGCACAAGTTCCCTT           |
| <i>Cd11b</i>       | F: ATGGACGCTGATGGCAATACC           | R: TCCCCATTCACGTCTCCCA             |
| <i>Cd11c</i>       | F: CTGGATAGCCTTTCTTCTGCTG          | R: GCACACTGTGTCCGAACTCA            |
| <i>Cd36</i>        | F: ATGGGCTGTGATCGGAACTG            | R: GTCTTCCCAATAAGCATGTCTCC         |
| <i>Cidea</i>       | F: TGACATTCATGGGATTGCAGAC          | R: GGCCAGTTGTGATGACTAAGAC          |
| <i>Cpt1a</i>       | F: CTCCGCCTGAGCCATGAAG             | R: CACCAGTGATGATGCCATTCT           |
| <i>Cpt1β</i>       | F: GCACACCAGGCAGTAGCTTT            | R: CAGGAGTTGATTCCAGACAGGT          |
| <i>Dio2</i>        | F: AATTATGCCTCGGAGAAGACCG          | R: GGCAGTTGCCTAGTGAAAGGT           |
| <i>Elovl3</i>      | F: TTCTCACGCGGGTTAAAAATGG          | R: GAGCAACAGATAGACGACCAC           |
| <i>F4/80</i>       | F: TGA CTCACCTTGTGGTCCTAA          | R: CTTCCAGAATCCAGTCTTTCC           |
| <i>Fabp4</i>       | F: AAGGTGAAGAGCATCATAACCC          | R: TCACGCCTTTCATAACACATTCC         |
| <i>Fas</i>         | F: GGAGGTGGTG ATAGCCGGTAT          | R: TGGGTAATCCATAGAGCCCAG           |
| <i>Fgf21</i>       | F: CTGCTGGGGGTCTACCAAG             | R: CTGCGCCTACCACTGTTCC             |
| <i>G6p</i>         | F: CGACTCGCTATCTCCAAGTGA           | R: GTTGAACCAGTCTCCGACCA            |
| <i>Gapdh</i>       | F: AGGTCGGTGTGAACGGATTTG           | R: TGTAGACCATGTAGTTGAGGTCA         |
| <i>Ifny</i>        | F: ATGAACGCTACACACTGCATC           | R: CCATCCTTTTGCCAGTTCTCTC          |
| <i>Il1β</i>        | F: GCAACTGTTCTGAAC TCAACT          | R: ATCTTTTGGGGTCCGTCAACT           |
| <i>Il6</i>         | F: TAGTCCTTCCTACCCCAATTTCC         | R: TTGGTCCTTAGCCACTCCTTC           |
| <i>Leptin</i>      | F: GAGACCCCTGTGTCCGGTTC            | R: CTGCGTGTGTGAAATGTCATTG          |
| <i>Mcp1</i>        | F: TTAAAAACCTGGATCGGAACCA          | R: GCATTAGCTTCAGATTTACGGGT         |
| <i>Mgat1</i>       | F: TGGTGCCAGTTTGGTTCCAG            | R: TGCTCTGAGGTCGGGTTCA             |
| <i>Pgc1α</i>       | F: TATGGAGTGACATAGAGTGTGC          | R: CCACTTCA ATCCACCCAGAAAG         |
| <i>Pepck</i>       | F: CTGCATAACGGTCTGGACTTC           | R: CAGCAACTGCCCGTACTCC             |
| <i>Pparγ2</i>      | F: TCGCTGATGCACTGCCTATG            | R: GAGAGGTCCACAGAGCTGATT           |
| <i>Scd1</i>        | F: TTCTTGCGATACTCTGGTGC            | R: CGGGATTGAATGTTCTTGTCGT          |
| <i>Srebp1c</i>     | F: GCAGCCACCATCTAGCCTG             | R: CAGCAGTGAGTCTGCCTTGAT           |
| <i>Tnfa</i>        | F: CCCTCACACTCAGATCATCTTC          | R: GCTACGACGTGGGCTACAG             |
| <i>Ucp1</i>        | F: AGGCTTCCAGTACCATTAGGT           | R: CTGAGTGAGGCAAAGCTGATTT          |
| <i>Ucp2</i>        | F: ATGGTTGGTTTCAAGGCCACA           | R: CGGTATCCAGAGGGAAAGTGAT          |
| <i>Ucp3</i>        | F: CTGCACCGCCAGATGAGTTT            | R: ATCATGGCTTGAAATCGGACC           |
